# Supplementary material
Source: PubMed Central journal article supplement (PMC4926613)
Supplement: NIHMS792580-supplement-216_2016_9564_MOESM1_ESM.pdf [file NIHMS792580-supplement-216_2016_9564_MOESM1_ESM.pdf]

**Analytical and Bioanalytical Chemistry**

**Electronic Supplementary Material**

**Optimization and comparison of bottom-up proteomic sample preparation  
for early-stage *Xenopus laevis* embryos**

Elizabeth H. Peuchen, Liangliang Sun, Norman J. Dovichi

216\_2016\_9564\_MOESM2\_ESM.xlsx

## **Content**

Figure S1 – cluster analysis comparing protein identifications

Figure S2 – comparison of lysing buffer extraction methods

Figure S3 – ability of Freon to remove hydrophobic proteins which are primarily yolk proteins

Figure S4 – venn diagram of protein extraction for individual lysing methods

Figure S5 – venn diagram of reproducibility between sample preparation methods

Figure S6 – bar graphs depicting regions of cell protein is extracted from

Figure S7 – extracted chromatograms showing the shift in retention time for NP40 and SDS

Methods – preparation of standard reagents

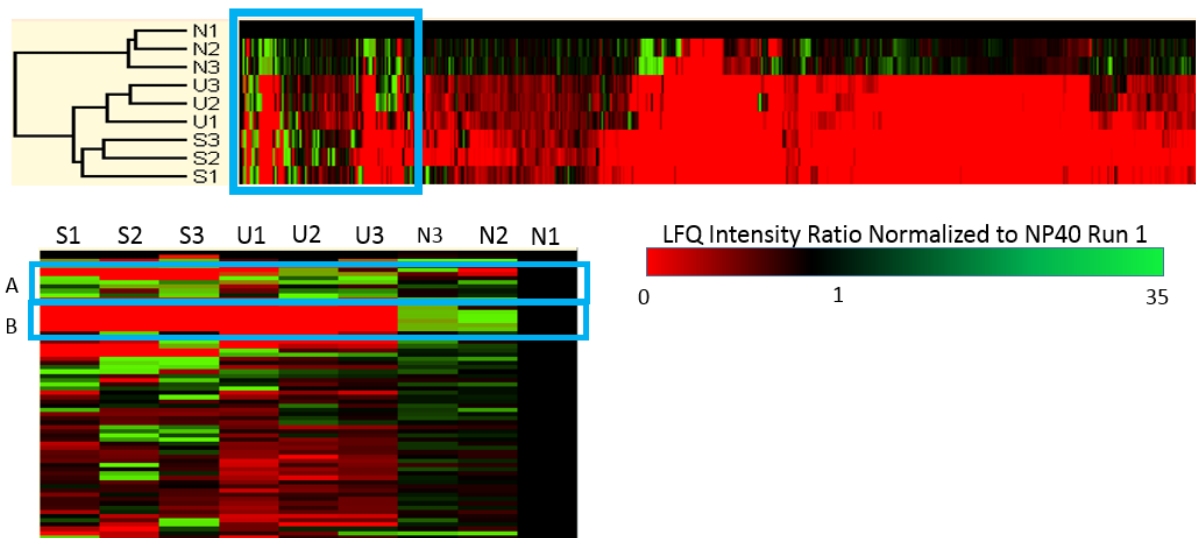

**Fig. S1** Heat map and clustering of the data for each of the three lysing methods. Samples were normalized to NP40 run 1 label free quantification intensity. Designation of each run was labeled with the first letter of the lysing method (N: NP40, U: 8M Urea, S: SDS with Freon treatment) followed by the run number. S1A demonstrates increased expression of proteins using SDS with the Freon treatment or 8M urea as a lysing method. S1B demonstrates increased expression of proteins with NP40. Any sample that was not able to identify in all the samples was excluded from the heat map and clustering analysis

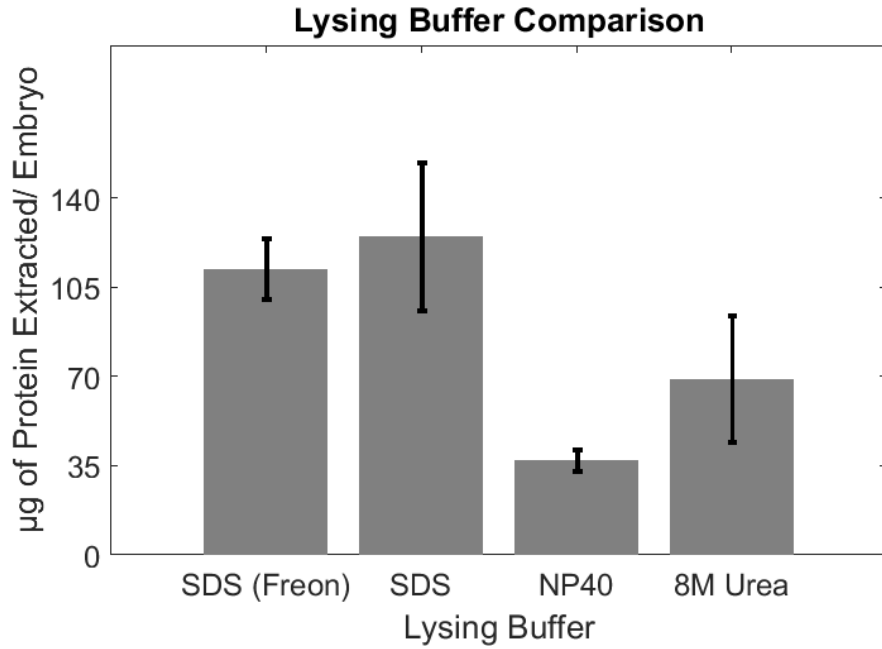

**Fig. S2** Comparison of lysing buffer extraction methods. Corresponds with Table 1

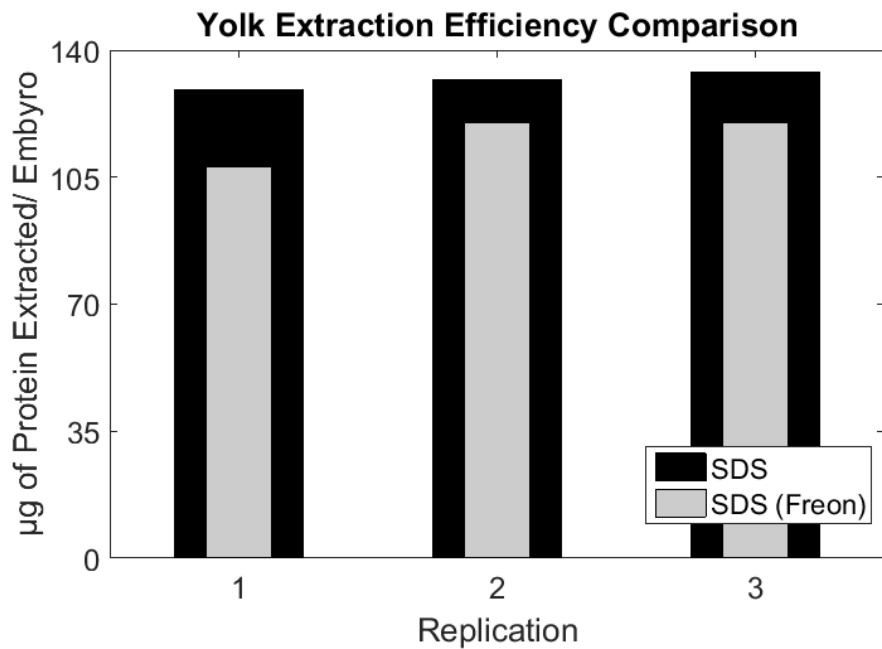

**Fig. S3** Ability of Freon to remove hydrophobic proteins which are primarily yolk proteins (shown in Figure 1)

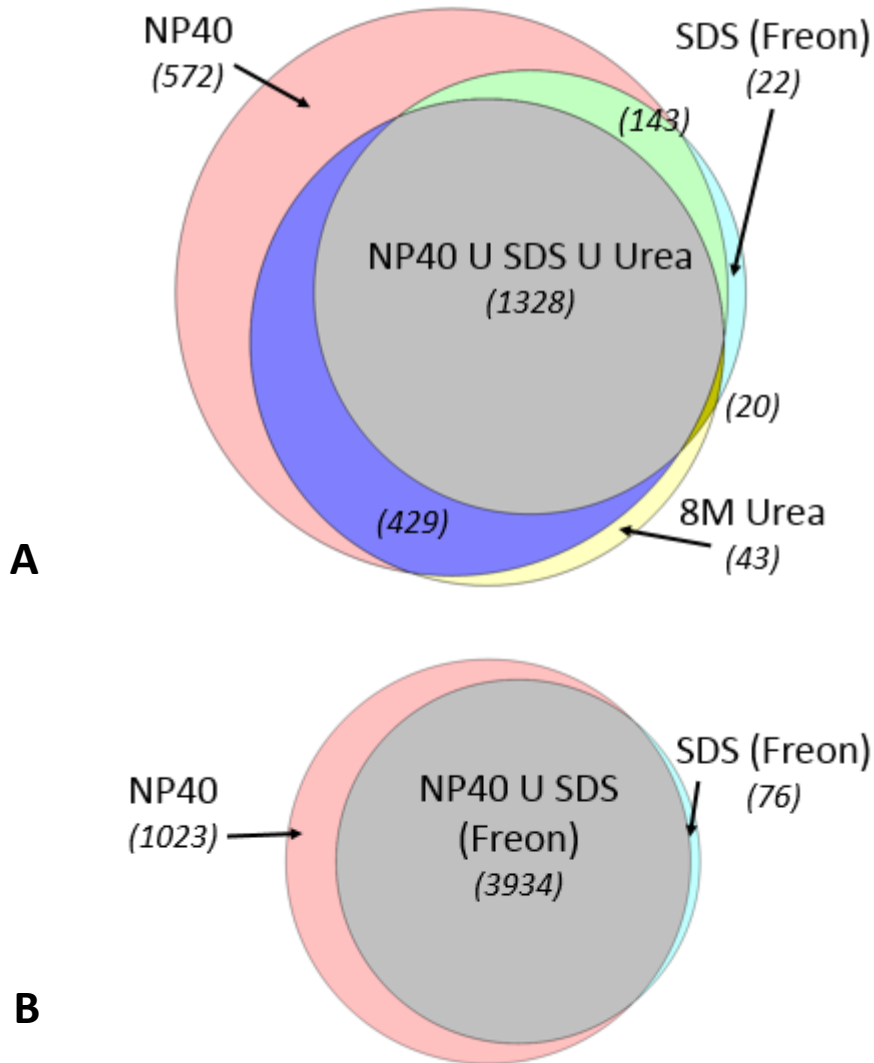

**Fig. S4** Venn diagrams showing the ability of each lysing method to identify proteins with a specific extraction method. S4A Corresponds with the proteins identified in table 2. S4B corresponds with results heading: Large-scale proteome analysis of *Xenopus* stage 2 embryo lysate when NP40 and SDS were fractionated before analysis

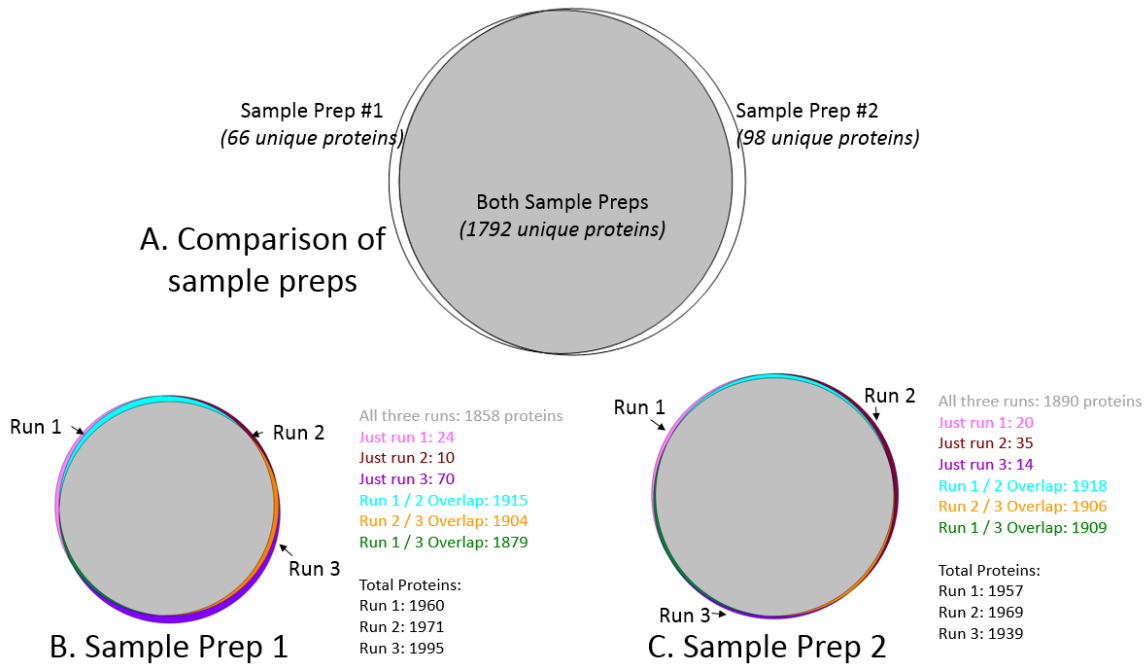

**Fig. S5** Venn diagrams showing the reproducibility of protein extraction between two individual sample preparation methods and their overlap in proteins identified. 5A shows the comparison of the two individual sample preparations. To count a protein as identified – it was required to be identified in all three runs for this venn diagram. 5B and C show individual runs in triplicate for each of the sample preparation methods

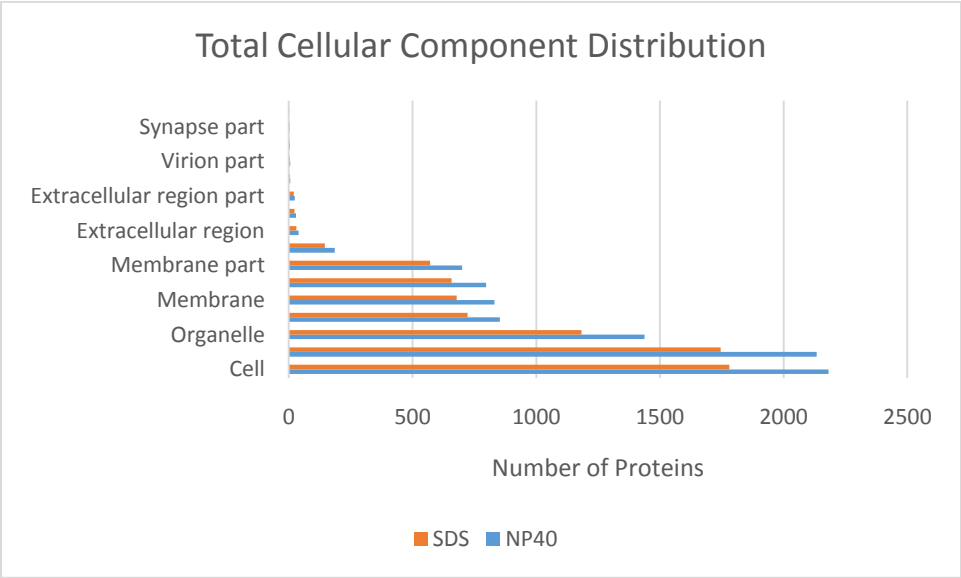

**Fig. S6A** Bar graph highlighting the distribution of cellular extraction. Overall, NP40 is able to extract additional proteins for all groups. All data for figures S6 was obtained from Uniprot gene ontology, cellular ontology analysis

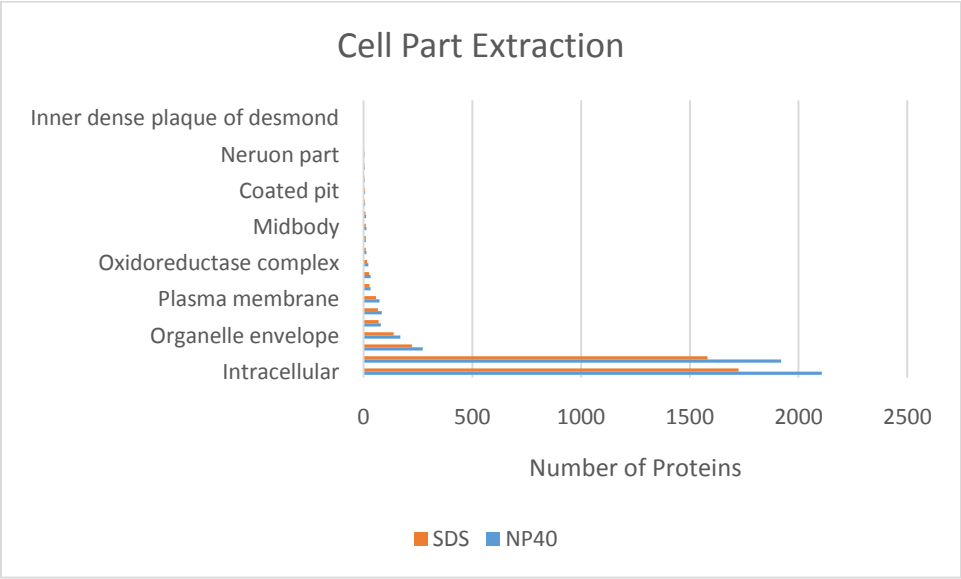

**Fig. S6B** From Fig. S6A, the extraction of cell parts within the sample

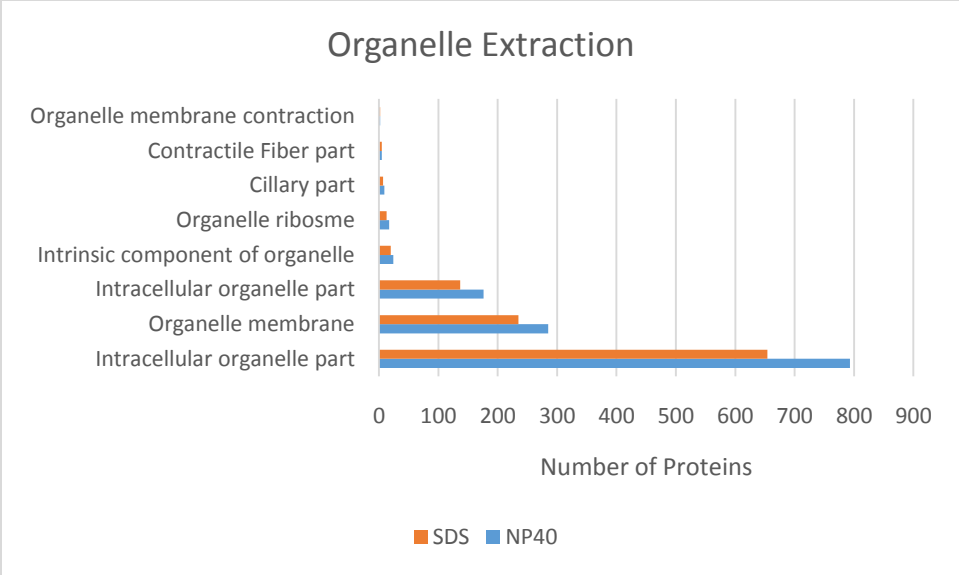

**Fig. S6C** From Fig. S6A, the extraction of organelle parts within the sample



S7A

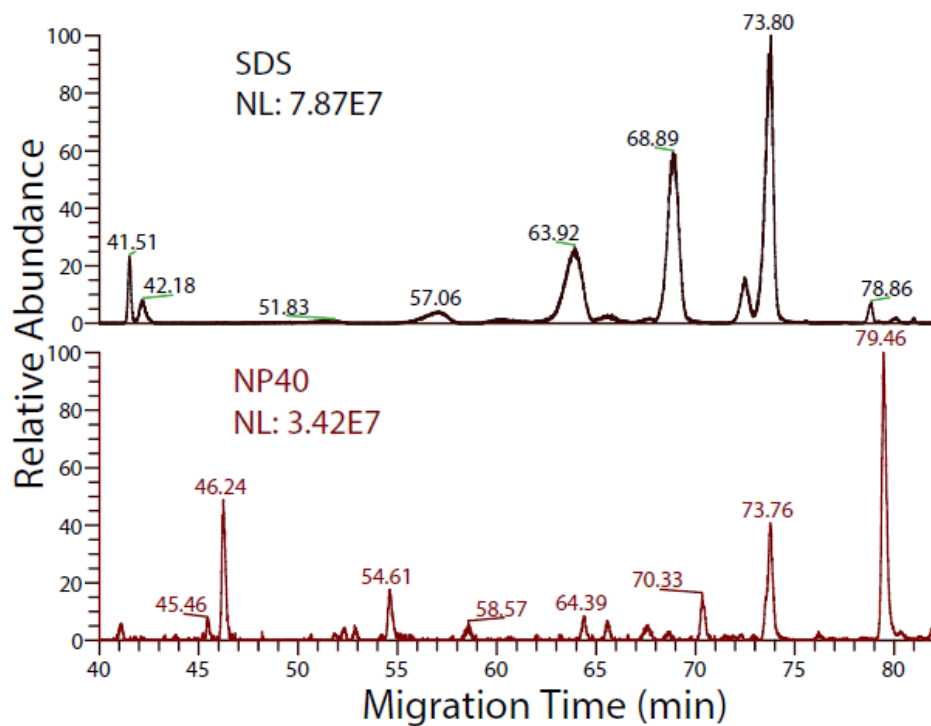

S7B

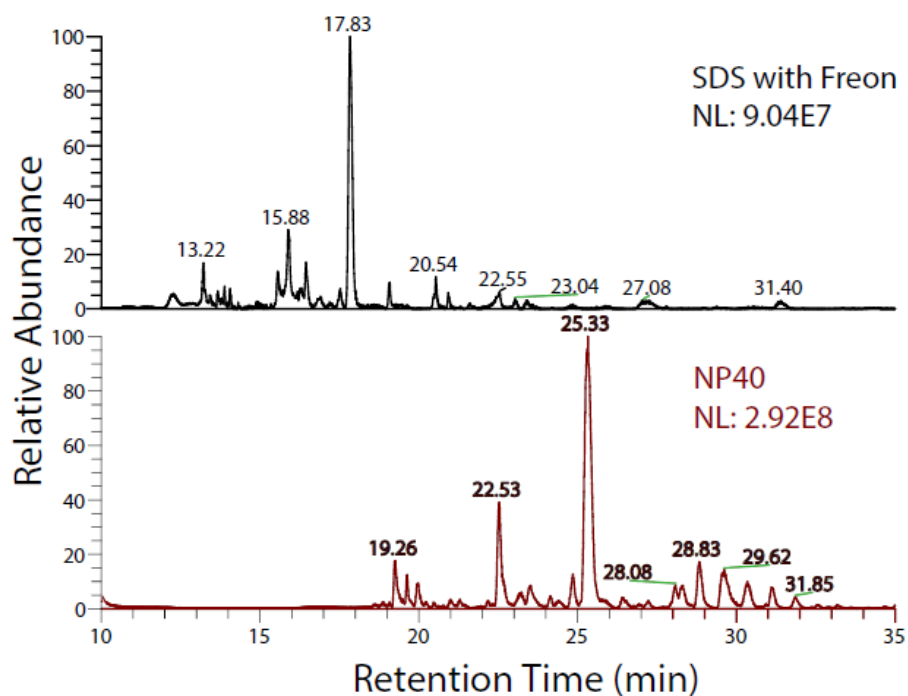

**Fig. S7** Extracted chromatograms showing the shift in retention time for SDS, because of the high abundance of yolk protein in the sample initially. (A) is extracted at 458.02 m/z and (B) is extracted at 1023 m/z

## **In-House Recipes:**

### ***Marc's Modified Ringer's (MMR)***

0.1 M NaCl  
2.0 mM KCl  
1 mM MgSO<sub>4</sub>  
2 mM CaCl<sub>2</sub>  
5 mM HEPES (pH 7.8)  
Adjust pH to 7.4

### ***MBS (Modified Barth's Saline)***

Prepare two solutions: 0.1M CaCl<sub>2</sub> and 10X MBS salts (NaCl/KCl/MgSO<sub>4</sub>/HEPES/NaHCO<sub>3</sub>)  
0.1M CaCl<sub>2</sub>

11.1 g/liter  
autoclave and store aliquots at -20 deg C or 4 deg C

10X MBS salts

880 mM NaCl  
10 mM KCl  
50 mM HEPES (pH 7.8)  
25 mM NaHCO<sub>3</sub>

Adjust final pH to 7.8 with NaOH; autoclave.

Prepare the final MBS solution by mixing 100 ml of 10X salt solution with 7 ml of 0.1M CaCl<sub>2</sub>; adjust the volume up to 1 liter with distilled water. The following are the final concentrations:

88 mM NaCl  
1 mM CaCl<sub>2</sub>  
1 mM MgSO<sub>4</sub>  
5 mM HEPES (pH 7.8)  
2.5 mM NaHCO<sub>3</sub>

\*All reagents for MMR and MBS were from Fisher Scientific (Waltham, MA)
